# Supplementary material for: Mechanism of YuPingFeng in the Treatment of COPD Based on Network Pharmacology
Source: Biomed Res Int. 2020 May 27;2020:1630102. doi: 10.1155/2020/1630102 (PMC7275212; doi:10.1155/2020/1630102)
Supplement: Supplementary Materials — Table S1: putative targets of each herb contained in YPF. Table S2: known therapeutic targets for COPD. Table S3: disease-drug-ingredient-target interaction network. [file 1630102.f1.zip]

Archive with 3 entries (3 files):
- TableS1 Putative targets of each herb contained in YPF.xlsx
- TableS2 Known therapeutic targets for COPD.xlsx
- TableS3 Disease-drug-ingredient-target interaction network.xlsx
