# Supplementary material for: Mechanism of YuPingFeng in the Treatment of COPD Based on Network Pharmacology
Source: Biomed Res Int. 2020 May 27;2020:1630102. doi: 10.1155/2020/1630102 (PMC7275212; doi:10.1155/2020/1630102)
Supplement: Supplementary Materials — Table S1: putative targets of each herb contained in YPF. Table S2: known therapeutic targets for COPD. Table S3: disease-drug-ingredient-target interaction network. [file 1630102.f1.zip › TableS1 Putative targets of each herb contained in YPF.xlsx]

## Sheet: YPF
Title:Mechanism of YuPingFeng in the Treatment of COPD Based on Network Pharmacology Authors: Yunhong Yin et al.
Table S1 Putative targets of each herb contained in YPF
	Putative targets of Huangqi				Putative targets of Fangfeng				Putative targets of Baizhu				ALL of putative targets
		PTGS1				ESR1				PGR				PTGS1
		CHRM3				AR				CHRM3				CHRM3
		CHRM1				F7				CHRM1				CHRM1
		ESR1				PRSS1				AR				ESR1
		AR				NCOA1				ACHE				AR
		PPARG				PTGS1				ADRA1A				PPARG
		CHRM5				CHRM1				CHRM2				CHRM5
		ADRA2C				GABRA1				GABRA1				ADRA2C
		CHRM4				ACHE				NCOA2				CHRM4
		ADRA1A				ADRA1A				NCOA1				ADRA1A
		CHRM2				ESR2								CHRM2
		ESR2				GSK3B								ESR2
		GABRA1				PGR								GABRA1
		GSK3B				NCOA2								GSK3B
		CHEK1				NR3C2								CHEK1
		RXRB				CHRM3								RXRB
		PRSS1				CHRM4								PRSS1
		NCOA2				CHRM2								NCOA2
		HTR3A				CHRNA2								HTR3A
		ACHE				BCL2								ACHE
		NCOA1				CASP9								NCOA1
		PGR				CASP3								PGR
		F7				CASP8								F7
		RELA				PRKCA								RELA
		IKBKB				PON1								IKBKB
		BCL2				CHEK1								BCL2
		AHSA1												AHSA1
		CASP3												CASP3
		MAPK8												MAPK8
		CYP3A4												CYP3A4
		CYP1A1												CYP1A1
		ICAM1												ICAM1
		SELE												SELE
		VCAM1												VCAM1
		CYP1B1												CYP1B1
		ALOX5												ALOX5
		GSTP1												GSTP1
		AHR												AHR
		PSMD3												PSMD3
		SLC2A4												SLC2A4
		NR1I3												NR1I3
		DIO1												DIO1
		GSTM1												GSTM1
		GSTM2												GSTM2
		AKR1C3												AKR1C3
		AKR1B1												AKR1B1
		EGFR												EGFR
		VEGFA												VEGFA
		CCND1												CCND1
		FOS												FOS
		EIF6												EIF6
		CASP9												CASP9
		PLAU												PLAU
		RB1												RB1
		IL6												IL6
		TP63												TP63
		ELK1												ELK1
		NFKBIA												NFKBIA
		POR												POR
		CASP8												CASP8
		RAF1												RAF1
		PRKCA												PRKCA
		HIF1A												HIF1A
		RUNX1T1												RUNX1T1
		ERBB2												ERBB2
		ACACA												ACACA
		CAV1												CAV1
		MYC												MYC
		PTGER3												PTGER3
		BIRC5												BIRC5
		DUOX2												DUOX2
		NOS3												NOS3
		HSPB1												HSPB1
		MGAM												MGAM
		CCNB1												CCNB1
		NFE2L2												NFE2L2
		NQO1												NQO1
		PARP1												PARP1
		COL3A1												COL3A1
		DCAF5												DCAF5
		CHEK2												CHEK2
		HSF1												HSF1
		CRP												CRP
		RUNX2												RUNX2
		RASSF1												RASSF1
		CTSD												CTSD
		IGFBP3												IGFBP3
		IGF2												IGF2
		IRF1												IRF1
		ERBB3												ERBB3
		PON1												PON1
		NPEPPS												NPEPPS
		HK2												HK2
		RASA1												RASA1
														NR3C2
														CHRNA2
