# Supplementary material for: Mechanism of YuPingFeng in the Treatment of COPD Based on Network Pharmacology
Source: Biomed Res Int. 2020 May 27;2020:1630102. doi: 10.1155/2020/1630102 (PMC7275212; doi:10.1155/2020/1630102)
Supplement: Supplementary Materials — Table S1: putative targets of each herb contained in YPF. Table S2: known therapeutic targets for COPD. Table S3: disease-drug-ingredient-target interaction network. [file 1630102.f1.zip › TableS2 Known therapeutic targets for COPD.xlsx]

## Sheet: Sheet1
Title:Mechanism of YuPingFeng in the Treatment of COPD Based on Network Pharmacology
Authors: Yunhong Yin et al.
	Table S2 Known therapeutic targets for COPD
Known therapeutic targets from OMIM					Known therapeutic targets from GeneCards						overlape between the two database
		AD7CNTP						AKT1				AKT1
		BCC1						CDK4				CDK4
		CMM						EGFR				EGFR
		MLM						ERBB2				ERBB2
		DNS						ERBB4				ERBB4
		CTRCT8						FGFR1				FGFR1
		CCV						FGFR3				FGFR3
		DEL1p36						IGF1R				IGF1R
		C1DELp36						MET				MET
		IBD7						PDGFRA				PDGFRA
		MS4						PDGFRB				PDGFRB
		PSORS7						RAF1				RAF1
		ISG15						BRAF				BRAF
		G1P2						FGFR2				FGFR2
		IFI15						MAP2K1				MAP2K1
		IMD38						MTOR				MTOR
		AGRN						AKT2				AKT2
		CMS8						ATM				ATM
		TNFRSF4						BTK				BTK
		TXGP1L						CDK2				CDK2
		OX40						CDK6				CDK6
		ACT35						CHEK2				CHEK2
		IMD16						CTNNB1				CTNNB1
		B3GALT6						ERBB3				ERBB3
		SEMDJL1						ESR1				ESR1
		EDSSPD2						FLT3				FLT3
		SCNN1D						INSR				INSR
		DVL1						JAK2				JAK2
		DRS2						KDR				KDR
		CCNL2						LCK				LCK
		ATAD3C						MAP2K2				MAP2K2
		ATAD3B						MMP2				MMP2
		TOB3						MMP9				MMP9
		KIAA1273						NTRK2				NTRK2
		ATAD3A						PIK3CD				PIK3CD
		HAYOS						PRKCD				PRKCD
		MIB2						RET				RET
		NADK						TP53				TP53
		GNB1						ABL1				ABL1
		MRD42						ADAM10				ADAM10
		PRKCZ						AR				AR
		PKC2						BCL2				BCL2
		SKI						BCR				BCR
		SGS						CASP8				CASP8
		PEX10						CCND1				CCND1
		NALD						CDK5				CDK5
		PBD6A						CHUK				CHUK
		PBD6B						CSF1R				CSF1R
		PLCH2						CTSD				CTSD
		PLCL4						CXCR4				CXCR4
		TNFRSF14						DDC				DDC
		HVEM						DDR2				DDR2
		TR2						DPYD				DPYD
		PRDM16						FGFR4				FGFR4
		MEL1						FLT4				FLT4
		LVNC8						HMOX1				HMOX1
		CMD1LL						HRAS				HRAS
		MEGF6						IDH1				IDH1
		EGFL3						IKBKB				IKBKB
		WDR8						KIT				KIT
		TP73						MAPK14				MAPK14
		SMIM1						MDM2				MDM2
		VEL						MYC				MYC
		NPHP4						MYLK				MYLK
		SLSN4						NFKB1				NFKB1
		RPL22						NFKB2				NFKB2
		EAP						NOTCH1				NOTCH1
		ICMT						PIK3CA				PIK3CA
		TNFRSF25						PPARG				PPARG
		TNFRSF12						PTEN				PTEN
		DR3						SOD1				SOD1
		LARD						SRC				SRC
		PLEKHG5						STAT1				STAT1
		KIAA0720						STAT3				STAT3
		DSMA4						TGFB1				TGFB1
		CMTRIC						TGFBR1				TGFBR1
		SCZD12						TNF				TNF
		TNFRSF9						ALK				ALK
		ILA						ATR				ATR
		CD137						CFTR				CFTR
		DJ1						COMT				COMT
		PARK7						CREBBP				CREBBP
		MIG6						EPHB4				EPHB4
		RALT						HDAC2				HDAC2
		SLC45A1						HDAC6				HDAC6
		DNB5						HGF				HGF
		IDDNPF						IDH2				IDH2
		ENO1						JAK3				JAK3
		PPH						MAPK1				MAPK1
		MPB1						MMP1				MMP1
		MIR34A						PIK3R1				PIK3R1
		MIRN34A						PLAU				PLAU
		H6PD						PRKACA				PRKACA
		GDH						PRKAR1A				PRKAR1A
		G6PDH						PTPN11				PTPN11
		CORTRD1						SLC2A1				SLC2A1
		SLC25A33						TGFBR2				TGFBR2
		PIK3CD						TH				TH
		APDS						TLR3				TLR3
		IMD14						UCHL1				UCHL1
		CLSTN1						ABCB1				ABCB1
		KIAA0911						ABCG2				ABCG2
		CTNNBIP1						ACTG1				ACTG1
		ICAT						ACVR1				ACVR1
		NMNAT1						ACVR2B				ACVR2B
		NMNAT						ADA				ADA
		PNAT1						ADAM17				ADAM17
		LCA9						ADK				ADK
		KIF1B						AHCY				AHCY
		CMT2A						ALB				ALB
		CMT2A1						ALPL				ALPL
		NBLST1						APOE				APOE
		CORT						APP				APP
		CASZ1						ATP2A2				ATP2A2
		SRG						BMPR1A				BMPR1A
		TARDBP						BRCA1				BRCA1
		TDP43						CA2				CA2
		ALS10						CALR				CALR
		MASP2						CASP3				CASP3
		MTOR						CASR				CASR
		FRAP1						CBL				CBL
		SKS						CDC42				CDC42
		UBIAD1						CDH1				CDH1
		TERE1						CDKN1A				CDKN1A
		SCCD						CDKN2A				CDKN2A
		PTCHD2						CSNK2A1				CSNK2A1
		DISP3						CTSB				CTSB
		KIAA1337						DNM1				DNM1
		MTHFR						DNMT1				DNMT1
		CLCN6						DNMT3A				DNMT3A
		NPPA						EGF				EGF
		PND						EP300				EP300
		ANP						EPHB2				EPHB2
		ATFB6						ESRRB				ESRRB
		ATRST2						FLT1				FLT1
		NPPB						FOS				FOS
		BNP						FTH1				FTH1
		PLOD1						FZD4				FZD4
		LH1						GAD1				GAD1
		LLH						GCK				GCK
		EDSKCL1						GJA1				GJA1
		MFN2						GLUD1				GLUD1
		KIAA0214						GNAS				GNAS
		CMT2A2A						GRM1				GRM1
		HMSN6A						GSK3B				GSK3B
		CMT2A2B						GSTP1				GSTP1
		TNFRSF8						HCK				HCK
		CD30						HDAC4				HDAC4
		D1S166E						HNF4A				HNF4A
		TNFRSF1B						HSPB1				HSPB1
		TNFR2						ICAM1				ICAM1
		TNFBR						IL2RA				IL2RA
		GBD2						ITGA2B				ITGA2B
		DHRS3						ITGB2				ITGB2
		RETSDR1						KCNH2				KCNH2
		PDPN						KRAS				KRAS
		TI1A						LDHA				LDHA
		T1A2						LPL				LPL
		GP36						LYN				LYN
		OTS8						MAP3K7				MAP3K7
		AGGRUS						MAPK10				MAPK10
		EFHD2						MAPT				MAPT
		SWS1						MME				MME
		CTRC						MMP13				MMP13
		CLCR						MMP14				MMP14
		PLEKHM2						MMP3				MMP3
		SKIP						MPO				MPO
		KIAA0842						NFKBIA				NFKBIA
		FBLP1						NGF				NGF
		MIGFILIN						NOS3				NOS3
		SPEN						NR3C1				NR3C1
		MINT						NRAS				NRAS
		SHARP						NT5E				NT5E
		HIAA0929						NTRK3				NTRK3
		ANIB3						PCNA				PCNA
		CLCNKA						PCSK9				PCSK9
		CLCNKB						PGR				PGR
		EPHA2						PIM1				PIM1
		ECK						PRKCA				PRKCA
		CTPP1						PRKCE				PRKCE
		CTPA						PTCH1				PTCH1
		ARCC2						PTPRC				PTPRC
		CTRCT6						RAC2				RAC2
		FBXO42						RAD51				RAD51
		FBX42						RARA				RARA
		KIAA1332						SCN5A				SCN5A
		MFAP2						SERPINE1				SERPINE1
		MAGP						SLC9A1				SLC9A1
		MAGP1						SMAD4				SMAD4
		ATP13A2						SMARCA4				SMARCA4
		PARK9						SOD2				SOD2
		KRPPD						SPARC				SPARC
		SPG78						TEK				TEK
		SDHB						TERT				TERT
		SDH2						TLR4				TLR4
		SDHIP						TNFRSF10B				TNFRSF10B
		PGL4						VDR				VDR
		PADI1						ABCC2				ABCC2
		PADI4						ACVRL1				ACVRL1
		PADI5						ADRB2				ADRB2
		PAD						AGTR1				AGTR1
		PADI6						AHR				AHR
		PREMBL2						ALDH2				ALDH2
		ALDH4A1						APOA1				APOA1
		ALDH4						ARG1				ARG1
		P5CDH						AURKA				AURKA
		EMC1						B2M				B2M
		KIAA0090						BMPR1B				BMPR1B
		CAVIPMR						BUB1B				BUB1B
		AKR7A3						CACNA1A				CACNA1A
		AFAR2						CACNA1C				CACNA1C
		D1S1733E						CACNA1G				CACNA1G
		DAN						CACNA1H				CACNA1H
		PLA2G2E						CAPN1				CAPN1
		PLA2G2A						CASP1				CASP1
		PLA2B						CASP7				CASP7
		PLA2L						CAT				CAT
		MOM1						CCND2				CCND2
		PLA2G5						CD19				CD19
		FRFB						CD4				CD4
		PLA2G2F						CDH2				CDH2
		MUL1						CHEK1				CHEK1
		MULAN						COL1A1				COL1A1
		C1orf166						CPT2				CPT2
		PINK1						CTH				CTH
		PARK6						CYP17A1				CYP17A1
		DDOST						CYP19A1				CYP19A1
		OST						CYP1B1				CYP1B1
		OST48						CYP2C9				CYP2C9
		CDG1R						CYP2D6				CYP2D6
		ECE1						CYP3A4				CYP3A4
		ALPL						DBH				DBH
		HOPS						DHFR				DHFR
		TNSALP						DNMT3B				DNMT3B
		USP48						DPP4				DPP4
		USP31						DRD2				DRD2
		HSPG2						DSP				DSP
		PLC						EDNRA				EDNRA
		SJS						EDNRB				EDNRB
		SJA						EPOR				EPOR
		SJS1						FAS				FAS
		CDC42						FLI1				FLI1
		TKS						FN1				FN1
		WNT4						G6PD				G6PD
		SERKAL						GATA3				GATA3
		EPHA8						GLI3				GLI3
		EEK						GNAQ				GNAQ
		HEK3						GRB2				GRB2
		C1QA						GRIA3				GRIA3
		C1QC						GRIN1				GRIN1
		C1QG						GRIN2B				GRIN2B
		C1QB						HDAC1				HDAC1
		EPHB2						HDAC3				HDAC3
		EPHT3						IFNGR1				IFNGR1
		DRT						ITGA6				ITGA6
		ERK						ITGB1				ITGB1
		PCBC						ITGB3				ITGB3
		CAPB						ITPR1				ITPR1
		KDM1A						JAG1				JAG1
		LSD1						JAK1				JAK1
		AOF2						JUN				JUN
		BHC110						KCNK3				KCNK3
		KIAA0601						KCNMA1				KCNMA1
		CPRF						KCNQ1				KCNQ1
		HNRPR						LDLR				LDLR
		ASAP3						LIMK1				LIMK1
		UPLC1						MAP2K3				MAP2K3
		CENTB6						MAPK3				MAPK3
		DDEFL1						MAPK8				MAPK8
		ACAP4						MERTK				MERTK
		ID3						MYB				MYB
		MDS2						MYD88				MYD88
		RPL11						NOS1				NOS1
		DBA7						NOS2				NOS2
		GALE						NOTCH2				NOTCH2
		HMGCL						NOTCH3				NOTCH3
		FUCA1						NPM1				NPM1
		CNR2						NQO1				NQO1
		CB2						NR5A1				NR5A1
		CX5						NTRK1				NTRK1
		MYOM3						OPRM1				OPRM1
		IFNLR1						P4HB				P4HB
		IL28RA						PARP1				PARP1
		GRHL3						PDE3A				PDE3A
		SOM						PDGFB				PDGFB
		TFCP2L4						PFKM				PFKM
		VWS2						PLA2G7				PLA2G7
		STPG1						PLAT				PLAT
		MAPO2						PPIB				PPIB
		C1orf201						PRDX1				PRDX1
		RCAN3						PRKAA2				PRKAA2
		DSCR1L2						PRKAG2				PRKAG2
		MCIP3						PRKCQ				PRKCQ
		CLIC4						PRKDC				PRKDC
		MTCLIC						PRKG1				PRKG1
		RUNX3						PROC				PROC
		CBFA						PTGS2				PTGS2
		PEBP2A3						PTH1R				PTH1R
		AML2						PTPN1				PTPN1
		RHD						PTPN6				PTPN6
		RHCE						RAC1				RAC1
		RHNA						RARB				RARB
		TMEM57						RB1				RB1
		FLJ10747						RDX				RDX
		LDLRAP1						RELA				RELA
		ARH						ROCK1				ROCK1
		FHCB2						RXRA				RXRA
		FHCB1						SERPINA1				SERPINA1
		MAN1C1						SHH				SHH
		SELENON						SIRT1				SIRT1
		SEPN1						SLC6A3				SLC6A3
		SELN						SNCA				SNCA
		RSMD1						STAT5B				STAT5B
		CFTD						SYK				SYK
		STMN1						TBK1				TBK1
		LAP18						TBXAS1				TBXAS1
		SMN						TF				TF
		SLC30A2						TLR2				TLR2
		ZNT2						TNFRSF1A				TNFRSF1A
		TNZD						TPM1				TPM1
		CATSPER4						TRPC6				TRPC6
		UBXN11						TRPV4				TRPV4
		SOC						TSC2				TSC2
		CD52						TTR				TTR
		CDW52						TUBB				TUBB
		DHDDS						TYMS				TYMS
		HDS						VEGFA				VEGFA
		RP59						VIM				VIM
		DEDSM						WNT7A				WNT7A
		PIGV						YES1				YES1
		HPMRS1						YWHAE				YWHAE
		GPATCH3						ABCA1				ABCA1
		NR0B2						ACACA				ACACA
		SHP						ACE				ACE
		KDF1						ACE2				ACE2
		C1orf172						ADRB1				ADRB1
		ECTD12						AGT				AGT
		SLC9A1						ANXA1				ANXA1
		NHE1						APC				APC
		APNH						ASS1				ASS1
		LIKNS						ATP1A1				ATP1A1
		FCN3						BCHE				BCHE
		HAKA1						BMP4				BMP4
		GPR3						BMPR2				BMPR2
		WASF2						BRCA2				BRCA2
		WAVE2						BUB1				BUB1
		SCAR2						CACNA1B				CACNA1B
		AHDC1						CACNA1D				CACNA1D
		MRD25						CBS				CBS
		STX12						CCL2				CCL2
		STX13						CDH5				CDH5
		SMPDL3B						CDKN1B				CDKN1B
		ASML3B						CHRM3				CHRM3
		PTAFR						CHRNA4				CHRNA4
		ATP1F1						CYCS				CYCS
		IF1						CYP11A1				CYP11A1
		MECR						CYP2B6				CYP2B6
		NRBF1						DUSP6				DUSP6
		DYTOABG						EGLN1				EGLN1
		MATN1						ESR2				ESR2
		CRTM						F10				F10
		CMP						F2				F2
		LAPTM5						FASN				FASN
		SDC3						FYN				FYN
		SYND3						GLA				GLA
		SDCN						GLI2				GLI2
		PUM1						GSN				GSN
		KIAA0099						IGF1				IGF1
		SCA47						IL6				IL6
		SERINC2						IRAK1				IRAK1
		TINAGL1						KRT18				KRT18
		TINAGRP						LEPR				LEPR
		KHDRBS1						LRP5				LRP5
		SAM68						MEF2C				MEF2C
		CCDC28B						MGMT				MGMT
		MGC1203						MIF				MIF
		HDAC1						MSH6				MSH6
		RPD3L1						MVK				MVK
		SYNC1						MYH9				MYH9
		YARS						MYL2				MYL2
		CMTDIC						NF2				NF2
		TYRRS						PDE4D				PDE4D
		YTS						PDHA1				PDHA1
		YRS						PDPK1				PDPK1
		S100PBP						PIK3R2				PIK3R2
		S100PBPR						PLK1				PLK1
		FNDC5						POR				POR
		FRCP2						PRKCB				PRKCB
		HPCA						PRKCZ				PRKCZ
		DYT2						PRLR				PRLR
		AK2						PYGL				PYGL
		AZIN2						RORA				RORA
		ODC1L						RRM2B				RRM2B
		KIAA1945						RUNX1				RUNX1
		TRIM62						RYR1				RYR1
		DEAR1						SCD				SCD
		CSMD2						SCNN1B				SCNN1B
		KIAA1884						SGK1				SGK1
		HMGB4						SMAD3				SMAD3
		GBD3						STAT6				STAT6
		GJB4						STK11				STK11
		CX30.3						TGFB2				TGFB2
		EKVP2						THRA				THRA
		GJB3						TNNI3				TNNI3
		CX31						UGT1A1				UGT1A1
		DFNA2B						VCP				VCP
		EKVP						VWF				VWF
		GJA4						WAS				WAS
		CX37						WNT5A				WNT5A
		TEKT2						XIAP				XIAP
		TEKTB1						YWHAB				YWHAB
		COL8A2						ABCA3				ABCA3
		FECD1						ABCC1				ABCC1
		PPCD2						ACTA2				ACTA2
		CSF3R						ADCY1				ADCY1
		GCSFR						AK1				AK1
		SCN7						AKR1B1				AKR1B1
		ZC3H12A						AKR1C3				AKR1C3
		MCPIP						ALDOA				ALDOA
		MCPIP1						ALOX5				ALOX5
		SNIP1						ANPEP				ANPEP
		PMRED						ANTXR2				ANTXR2
		RSPO1						ATP2A1				ATP2A1
		FLJ40906						ATP7B				ATP7B
		C1orf109						AXIN2				AXIN2
		YRDC						BAX				BAX
		IRIP						BCL2L1				BCL2L1
		SF3A3						BLM				BLM
		SF3A60						BRIP1				BRIP1
		SAP61						C3				C3
		PRP9						CACNA1S				CACNA1S
		FHL3						CACNB2				CACNB2
		SLIM2						CALCR				CALCR
		UTP11L						CASP10				CASP10
		CGI94						CASP9				CASP9
		MYCBP						CAV1				CAV1
		NDUFS5						CCND3				CCND3
		MACF1						CD36				CD36
		ACF7						CD40				CD40
		KIAA1251						CD40LG				CD40LG
		LIS9						CD44				CD44
		PPIE						CDC25A				CDC25A
		CYP33						CDC25C				CDC25C
		TRIT1						CDH3				CDH3
		IPT						CHAT				CHAT
		COXPD35						CHRM2				CHRM2
		MYCL						CLDN1				CLDN1
		LMYC						COL2A1				COL2A1
		MFSD2A						COMP				COMP
		MCPH15						CP				CP
		CAP1						CREB1				CREB1
		PPT1						CSK				CSK
		CLN1						CTBP1				CTBP1
		RLF						CTNNA1				CTNNA1
		ZMPSTE24						CXCR2				CXCR2
		FACE1						CYLD				CYLD
		STE24						CYP2C19				CYP2C19
		MADB						CYP2C8				CYP2C8
		COL9A2						DDX58				DDX58
		EDM2						DES				DES
		STL5						DICER1				DICER1
		KCNQ4						DNM1L				DNM1L
		DFNA2A						EIF2AK3				EIF2AK3
		CTPS1						ELANE				ELANE
		CTPS						ENO1				ENO1
		IMD24						ENO2				ENO2
		SCMH1						ENPP1				ENPP1
		EDN2						EPAS1				EPAS1
		GUCA2B						ERCC3				ERCC3
		UGN						ETS1				ETS1
								EXT1				EXT1
								F12				F12
								FAAH				FAAH
								FANCA				FANCA
								FASLG				FASLG
								FCGR2B				FCGR2B
								FGA				FGA
								FGF1				FGF1
								FGF2				FGF2
								FGF8				FGF8
								FGG				FGG
								FLNA				FLNA
								FOXO1				FOXO1
								FSHR				FSHR
								FTL				FTL
								GAA				GAA
								GAPDH				GAPDH
								GATA2				GATA2
								GATA4				GATA4
								GBA				GBA
								GDF5				GDF5
								GDNF				GDNF
								GFAP				GFAP
								GGT1				GGT1
								GJB1				GJB1
								GLB1				GLB1
								GNAO1				GNAO1
								GNB3				GNB3
								GPX1				GPX1
								GRIA1				GRIA1
								GSR				GSR
								GSS				GSS
								GUSB				GUSB
								HADHB				HADHB
								HIF1A				HIF1A
								HMOX2				HMOX2
								HPGD				HPGD
								HSP90AA1				HSP90AA1
								HSPA8				HSPA8
								HSPD1				HSPD1
								HTR1A				HTR1A
								IDE				IDE
								IDS				IDS
								IFIH1				IFIH1
								IFNAR2				IFNAR2
								IFNG				IFNG
								IGF2				IGF2
								IKBKG				IKBKG
								IL1B				IL1B
								IL1RN				IL1RN
								IL2RB				IL2RB
								IL4R				IL4R
								IL6R				IL6R
								INS				INS
								IRAK3				IRAK3
								IRF1				IRF1
								IRF5				IRF5
								ISG15				ISG15
								ITGA4				ITGA4
								ITGB4				ITGB4
								KARS				KARS
								KCNN4				KCNN4
								KRT14				KRT14
								LEP				LEP
								LHCGR				LHCGR
								LIG4				LIG4
								LRP6				LRP6
								MAP3K5				MAP3K5
								MAPK13				MAPK13
								MAPK7				MAPK7
								MAPK9				MAPK9
								MAPKAPK2				MAPKAPK2
								MC2R				MC2R
								MCL1				MCL1
								MECOM				MECOM
								MFN2				MFN2
								MMP7				MMP7
								MPL				MPL
								MS4A1				MS4A1
								MSH2				MSH2
								MTHFR				MTHFR
								MUC1				MUC1
								MYH7				MYH7
								NAMPT				NAMPT
								NBN				NBN
								NCF1				NCF1
								NCF4				NCF4
								NF1				NF1
								NFATC1				NFATC1
								NFE2L2				NFE2L2
								NOD2				NOD2
								NPC1				NPC1
								NPR2				NPR2
								NR1H2				NR1H2
								NR1H4				NR1H4
								NR2F2				NR2F2
								NR3C2				NR3C2
								OAT				OAT
								P2RY12				P2RY12
								PAX6				PAX6
								PDHX				PDHX
								PIK3CB				PIK3CB
								PIK3CG				PIK3CG
								PINK1				PINK1
								PITX2				PITX2
								PKLR				PKLR
								PLA2G4A				PLA2G4A
								PLA2G6				PLA2G6
								PLCB1				PLCB1
								PLG				PLG
								PMS2				PMS2
								PNLIP				PNLIP
								POMC				POMC
								PPARD				PPARD
								PRKAA1				PRKAA1
								PRKACB				PRKACB
								PRMT1				PRMT1
								PTGER2				PTGER2
								PTGIR				PTGIR
								PTGS1				PTGS1
								PTK2				PTK2
								RAB27A				RAB27A
								RAB7A				RAB7A
								RARG				RARG
								REN				REN
								RHO				RHO
								ROR2				ROR2
								RPL11				RPL11
								RXRB				RXRB
								SCNN1A				SCNN1A
								SDHB				SDHB
								SERPINC1				SERPINC1
								SLC29A1				SLC29A1
								SLC4A1				SLC4A1
								SLC6A4				SLC6A4
								SOS1				SOS1
								STAT2				STAT2
								TAB2				TAB2
								TAP1				TAP1
								TBXA2R				TBXA2R
								TCF12				TCF12
								TFRC				TFRC
								TGM2				TGM2
								TKT				TKT
								TLR1				TLR1
								TLR5				TLR5
								TNFAIP3				TNFAIP3
								TNFRSF11B				TNFRSF11B
								TNFRSF1B				TNFRSF1B
								TNFSF11				TNFSF11
								TNNT2				TNNT2
								TPI1				TPI1
								TPMT				TPMT
								TPO				TPO
								TRPC3				TRPC3
								TSC1				TSC1
								TTN				TTN
								UBE3A				UBE3A
								USP9X				USP9X
								VCL				VCL
								WNT3A				WNT3A
								WT1				WT1
								XDH				XDH
								YY1				YY1
								ZEB1				ZEB1
								ZEB2				ZEB2
								ABCB11				ABCB11
								ABCC4				ABCC4
								ACACB				ACACB
								ACADS				ACADS
								ACP5				ACP5
								ACTA1				ACTA1
								ACVR1B				ACVR1B
								ADAM9				ADAM9
								ADAMTS13				ADAMTS13
								ADORA1				ADORA1
								ADORA2B				ADORA2B
								ADRA1A				ADRA1A
								ADRA1B				ADRA1B
								ADRA2A				ADRA2A
								AKR1C4				AKR1C4
								ALAD				ALAD
								ANXA2				ANXA2
								APAF1				APAF1
								APRT				APRT
								AQP1				AQP1
								AQP2				AQP2
								ARHGDIA				ARHGDIA
								ARSA				ARSA
								ATF4				ATF4
								ATF6				ATF6
								ATP7A				ATP7A
								AXIN1				AXIN1
								BDNF				BDNF
								BECN1				BECN1
								BIRC3				BIRC3
								BIRC5				BIRC5
								BMP1				BMP1
								BMP2				BMP2
								BUB3				BUB3
								C1S				C1S
								C5				C5
								CA4				CA4
								CACNA1F				CACNA1F
								CBR1				CBR1
								CCNB1				CCNB1
								CCR3				CCR3
								CCR5				CCR5
								CD28				CD28
								CD55				CD55
								CD59				CD59
								CD79A				CD79A
								CD81				CD81
								CD8A				CD8A
								CDC25B				CDC25B
								CDKN1C				CDKN1C
								CDKN2B				CDKN2B
								CDKN2C				CDKN2C
								CES1				CES1
								CETP				CETP
								CFLAR				CFLAR
								CHRNA2				CHRNA2
								CLU				CLU
								CNR1				CNR1
								COL1A2				COL1A2
								CRKL				CRKL
								CRP				CRP
								CSF2RA				CSF2RA
								CSNK2B				CSNK2B
								CTCF				CTCF
								CTLA4				CTLA4
								CTSH				CTSH
								CUL3				CUL3
								CYBB				CYBB
								CYP11B1				CYP11B1
								CYP11B2				CYP11B2
								CYP1A1				CYP1A1
								CYP1A2				CYP1A2
								CYP24A1				CYP24A1
								CYP27A1				CYP27A1
								CYP27B1				CYP27B1
								CYP2A6				CYP2A6
								CYP3A5				CYP3A5
								DAG1				DAG1
								DCN				DCN
								DCTN1				DCTN1
								DDR1				DDR1
								DKC1				DKC1
								DUSP1				DUSP1
								ECE1				ECE1
								ECHS1				ECHS1
								EDN1				EDN1
								EDN3				EDN3
								EHMT1				EHMT1
								EIF4EBP1				EIF4EBP1
								ENTPD1				ENTPD1
								EPHX1				EPHX1
								EPHX2				EPHX2
								ERCC2				ERCC2
								EXT2				EXT2
								F2R				F2R
								F7				F7
								FADD				FADD
								FEN1				FEN1
								FGB				FGB
								FGF10				FGF10
								FH				FH
								FKBP1A				FKBP1A
								FOLH1				FOLH1
								FOXP3				FOXP3
								FST				FST
								FUCA1				FUCA1
								FZD5				FZD5
								GABBR1				GABBR1
								GABRG2				GABRG2
								GAD2				GAD2
								GATA6				GATA6
								GCDH				GCDH
								GHR				GHR
								GJB2				GJB2
								GLI1				GLI1
								GNRHR				GNRHR
								GPI				GPI
								GPX4				GPX4
								GRIK2				GRIK2
								GRN				GRN
								HADHA				HADHA
								HDAC5				HDAC5
								HDAC8				HDAC8
								HDAC9				HDAC9
								HLA-A				HLA-A
								HPRT1				HPRT1
								HRH1				HRH1
								HSD17B4				HSD17B4
								HSD3B2				HSD3B2
								HSPA5				HSPA5
								HSPG2				HSPG2
								HTR2A				HTR2A
								HTR2C				HTR2C
								HTR3A				HTR3A
								IHH				IHH
								IKZF1				IKZF1
								IL10				IL10
								IL4				IL4
								IL7R				IL7R
								ILK				ILK
								IRF3				IRF3
								IRF7				IRF7
								IRS1				IRS1
								ITGA3				ITGA3
								ITGAM				ITGAM
								ITGAV				ITGAV
								ITPR3				ITPR3
								JUP				JUP
								KCNH1				KCNH1
								KCNJ2				KCNJ2
								KCNJ6				KCNJ6
								KDM1A				KDM1A
								KDM6A				KDM6A
								KEAP1				KEAP1
								KIF11				KIF11
								KLK3				KLK3
								KLKB1				KLKB1
								KRT5				KRT5
								KRT8				KRT8
								L1CAM				L1CAM
								LBR				LBR
								LCAT				LCAT
								LDHB				LDHB
								LEF1				LEF1
								LIPA				LIPA
								LMNA				LMNA
								LRP1				LRP1
								LRP2				LRP2
								LTA4H				LTA4H
								LYZ				LYZ
								MAN1B1				MAN1B1
								MBL2				MBL2
								MEN1				MEN1
								MITF				MITF
								MLH1				MLH1
								MMP10				MMP10
								MMP8				MMP8
								MSN				MSN
								MSR1				MSR1
								MSX2				MSX2
								MTHFD1				MTHFD1
								MTR				MTR
								MYCN				MYCN
								MYH10				MYH10
								MYH6				MYH6
								MYLK2				MYLK2
								NCF2				NCF2
								NCOA3				NCOA3
								NCSTN				NCSTN
								NEDD4L				NEDD4L
								NLRP3				NLRP3
								NME2				NME2
								NPPA				NPPA
								NR1H3				NR1H3
								NR1I2				NR1I2
								NR4A1				NR4A1
								NRP1				NRP1
								NRXN1				NRXN1
								ODC1				ODC1
								OGG1				OGG1
								PAFAH1B1				PAFAH1B1
								PAX2				PAX2
								PAX3				PAX3
								PCSK1				PCSK1
								PDCD1				PDCD1
								PDK1				PDK1
								PDX1				PDX1
								PGM1				PGM1
								PIN1				PIN1
								PKD2				PKD2
								PMM2				PMM2
								POLA1				POLA1
								POLB				POLB
								PON1				PON1
								POU5F1				POU5F1
								PPARGC1A				PPARGC1A
								PPIA				PPIA
								PRDX2				PRDX2
								PROS1				PROS1
								PSAT1				PSAT1
								PTGDR				PTGDR
								PTGIS				PTGIS
								PTH				PTH
								PTPN22				PTPN22
								RAD54L				RAD54L
								RAP1A				RAP1A
								RASA1				RASA1
								RBPJ				RBPJ
								RIPK2				RIPK2
								ROCK2				ROCK2
								RPL5				RPL5
								RUNX2				RUNX2
								SCP2				SCP2
								SDHA				SDHA
								SERPING1				SERPING1
								SETD2				SETD2
								SH2B3				SH2B3
								SH2D1A				SH2D1A
								SIRT2				SIRT2
								SLC11A1				SLC11A1
								SLC11A2				SLC11A2
								SLC19A1				SLC19A1
								SLC22A5				SLC22A5
								SLC25A1				SLC25A1
								SLC25A4				SLC25A4
								SLC2A4				SLC2A4
								SLC7A7				SLC7A7
								SLC9A3				SLC9A3
								SLCO1B1				SLCO1B1
								SMAD2				SMAD2
								SMPD1				SMPD1
								SOX9				SOX9
								SPHK1				SPHK1
								SSTR2				SSTR2
								STX1A				STX1A
								SUMO1				SUMO1
								TACR3				TACR3
								TCF4				TCF4
								TFAP2A				TFAP2A
								TGFA				TGFA
								TGFB3				TGFB3
								TLR8				TLR8
								TNC				TNC
								TNFRSF11A				TNFRSF11A
								TNFRSF13B				TNFRSF13B
								TNFSF10				TNFSF10
								TP63				TP63
								TPM3				TPM3
								TPT1				TPT1
								TRAF3				TRAF3
								TRAF6				TRAF6
								TRPV1				TRPV1
								TSHR				TSHR
								TUBA4A				TUBA4A
								TYMP				TYMP
								TYR				TYR
								TYRP1				TYRP1
								UNG				UNG
								USP15				USP15
								VCAN				VCAN
								VDAC1				VDAC1
								VEGFC				VEGFC
								VIPR1				VIPR1
								VKORC1				VKORC1
								WNK1				WNK1
								WNT1				WNT1
								WNT10A				WNT10A
								WNT3				WNT3
								WNT4				WNT4
								WRN				WRN
								WWOX				WWOX
								YAP1				YAP1
								YWHAQ				YWHAQ
								YWHAZ				YWHAZ
								ABCB4				ABCB4
								ACHE				ACHE
								ACTN4				ACTN4
								ADAM12				ADAM12
								ADH5				ADH5
								AFP				AFP
								AGXT				AGXT
								AMT				AMT
								ANTXR1				ANTXR1
								ANXA5				ANXA5
								AQP5				AQP5
								ARG2				ARG2
								ASL				ASL
								ATRX				ATRX
								BACE1				BACE1
								BARD1				BARD1
								BCL10				BCL10
								BIRC2				BIRC2
								BTRC				BTRC
								CCR1				CCR1
								CDH11				CDH11
								CDK1				CDK1
								CDK7				CDK7
								CDK9				CDK9
								CEBPA				CEBPA
								CFH				CFH
								CFI				CFI
								CHD7				CHD7
								CHRM1				CHRM1
								CHRNA7				CHRNA7
								CKB				CKB
								CLCN2				CLCN2
								COL4A3				COL4A3
								CPA1				CPA1
								CRK				CRK
								CTSL				CTSL
								CTSS				CTSS
								CUBN				CUBN
								CYBA				CYBA
								CYP2E1				CYP2E1
								CYSLTR2				CYSLTR2
								DCK				DCK
								DHCR7				DHCR7
								DMD				DMD
								DVL3				DVL3
								E2F4				E2F4
								EEF1A2				EEF1A2
								EGLN3				EGLN3
								EHMT2				EHMT2
								EIF4G1				EIF4G1
								ERCC1				ERCC1
								ERG				ERG
								ETFB				ETFB
								ETV6				ETV6
								F2RL1				F2RL1
								F5				F5
								F8				F8
								F9				F9
								FANCC				FANCC
								FANCD2				FANCD2
								FCGR2A				FCGR2A
								FGF5				FGF5
								GATA1				GATA1
								GPC3				GPC3
								GPC4				GPC4
								GSTM3				GSTM3
								GUCY2C				GUCY2C
								HBB				HBB
								HLA-DRB1				HLA-DRB1
								HMGCR				HMGCR
								HMGCS2				HMGCS2
								HNF1A				HNF1A
								HSD11B2				HSD11B2
								HYAL1				HYAL1
								IGFBP7				IGFBP7
								IL1R1				IL1R1
								IL2				IL2
								IL5RA				IL5RA
								ITCH				ITCH
								ITGA2				ITGA2
								ITGAL				ITGAL
								ITGB5				ITGB5
								KCNA5				KCNA5
								KLF4				KLF4
								KRT17				KRT17
								KRT19				KRT19
								LIG1				LIG1
								LIPC				LIPC
								LPAR1				LPAR1
								MAF				MAF
								MAP2K4				MAP2K4
								MASP1				MASP1
								MECP2				MECP2
								MUSK				MUSK
								MYBPC3				MYBPC3
								MYH11				MYH11
								NCAM1				NCAM1
								NEDD4				NEDD4
								NFATC2				NFATC2
								NGFR				NGFR
								NPY				NPY
								NR4A3				NR4A3
								NRG1				NRG1
								OXTR				OXTR
								PAK2				PAK2
								PAX5				PAX5
								PAX8				PAX8
								PDE4A				PDE4A
								PDE5A				PDE5A
								PLA2G2A				PLA2G2A
								POLD1				POLD1
								POLG				POLG
								PPP1CB				PPP1CB
								PRDM16				PRDM16
								PRDX5				PRDX5
								PRODH				PRODH
								PRSS1				PRSS1
								PSAP				PSAP
								PTGER4				PTGER4
								PTHLH				PTHLH
								RAG1				RAG1
								RAP1B				RAP1B
								RHOA				RHOA
								RIT1				RIT1
								RPS6KA2				RPS6KA2
								S100B				S100B
								S1PR2				S1PR2
								SAG				SAG
								SCNN1G				SCNN1G
								SELP				SELP
								SERPINH1				SERPINH1
								SERPINI1				SERPINI1
								SHMT1				SHMT1
								SKI				SKI
								SLC12A1				SLC12A1
								SLC3A1				SLC3A1
								SLC4A4				SLC4A4
								SLC9A3R1				SLC9A3R1
								SMAD9				SMAD9
								SMC3				SMC3
								SOS2				SOS2
								SOX10				SOX10
								SPP1				SPP1
								STAMBP				STAMBP
								STAR				STAR
								STAT4				STAT4
								STAT5A				STAT5A
								STUB1				STUB1
								SULT2B1				SULT2B1
								TAC3				TAC3
								TACR1				TACR1
								TAF1				TAF1
								TBX5				TBX5
								TFAP2B				TFAP2B
								TGFBR3				TGFBR3
								TGIF1				TGIF1
								TLR7				TLR7
								TLR9				TLR9
								TNNC1				TNNC1
								TP73				TP73
								TRPA1				TRPA1
								TRPM7				TRPM7
								TWIST1				TWIST1
								TXN				TXN
								VCAM1				VCAM1
								VHL				VHL
								XBP1				XBP1
								ZIC3				ZIC3
								A2M				A2M
								ABCC9				ABCC9
								ABCG5				ABCG5
								ACAN				ACAN
								ACPP				ACPP
								ACTG2				ACTG2
								ADCY10				ADCY10
								ADCY3				ADCY3
								ADCYAP1R1				ADCYAP1R1
								ADIPOQ				ADIPOQ
								ADIPOR1				ADIPOR1
								ADORA2A				ADORA2A
								ADRA1D				ADRA1D
								ADRA2C				ADRA2C
								AGL				AGL
								AGPAT2				AGPAT2
								AGRN				AGRN
								ALOX15				ALOX15
								ALPP				ALPP
								AMACR				AMACR
								ANG				ANG
								ANGPT1				ANGPT1
								ANGPTL4				ANGPTL4
								APEX1				APEX1
								APOB				APOB
								ARHGEF2				ARHGEF2
								ARID1B				ARID1B
								ARSB				ARSB
								ATP2A3				ATP2A3
								AVP				AVP
								BAK1				BAK1
								BAP1				BAP1
								BCL2L11				BCL2L11
								BCL6				BCL6
								BDKRB2				BDKRB2
								BID				BID
								BLVRA				BLVRA
								BMP7				BMP7
								BRD2				BRD2
								BTC				BTC
								C1QBP				C1QBP
								CA9				CA9
								CACNG2				CACNG2
								CANX				CANX
								CARD9				CARD9
								CASP4				CASP4
								CAST				CAST
								CCKBR				CCKBR
								CCNA2				CCNA2
								CCNH				CCNH
								CCR2				CCR2
								CCR4				CCR4
								CCR6				CCR6
								CCR7				CCR7
								CD14				CD14
								CD151				CD151
								CD22				CD22
								CD27				CD27
								CD274				CD274
								CD38				CD38
								CDC6				CDC6
								CDC73				CDC73
								CDON				CDON
								CFD				CFD
								CHD4				CHD4
								CHKB				CHKB
								CHRNA1				CHRNA1
								CHRNA5				CHRNA5
								CHRNB1				CHRNB1
								CHRNE				CHRNE
								CISH				CISH
								COL11A2				COL11A2
								COL5A1				COL5A1
								CPB2				CPB2
								CPOX				CPOX
								CR1				CR1
								CR2				CR2
								CRHR1				CRHR1
								CRYAB				CRYAB
								CST3				CST3
								CTRC				CTRC
								CTSC				CTSC
								CTSG				CTSG
								CX3CR1				CX3CR1
								CXCL12				CXCL12
								CYP21A2				CYP21A2
								CYP7B1				CYP7B1
								DDIT3				DDIT3
								DHCR24				DHCR24
								DKK1				DKK1
								DRD4				DRD4
								EGLN2				EGLN2
								EIF2AK2				EIF2AK2
								EIF2AK4				EIF2AK4
								EIF2S1				EIF2S1
								ELOVL4				ELOVL4
								ENG				ENG
								EPB41				EPB41
								EPHA3				EPHA3
								EPRS				EPRS
								ERCC4				ERCC4
								ERCC5				ERCC5
								ERCC6				ERCC6
								ETFA				ETFA
								ETFDH				ETFDH
								EYA1				EYA1
								EZR				EZR
								F11				F11
								F13A1				F13A1
								F3				F3
								FABP4				FABP4
								FBLN5				FBLN5
								FBN1				FBN1
								FCER2				FCER2
								FDFT1				FDFT1
								FGF23				FGF23
								FHIT				FHIT
								FLNB				FLNB
								FLNC				FLNC
								FOXP1				FOXP1
								FTO				FTO
								FZD7				FZD7
								GABRA2				GABRA2
								GABRD				GABRD
								GADD45A				GADD45A
								GALNS				GALNS
								GCLC				GCLC
								GFER				GFER
								GGPS1				GGPS1
								GH1				GH1
								GJA5				GJA5
								GLP1R				GLP1R
								GLRX				GLRX
								GLS				GLS
								GMNN				GMNN
								GNAT2				GNAT2
								GP1BA				GP1BA
								GP6				GP6
								GPR37				GPR37
								GPX2				GPX2
								GPX3				GPX3
								GZMB				GZMB
								HELLS				HELLS
								HERC2				HERC2
								HEXA				HEXA
								HIF1AN				HIF1AN
								HIPK2				HIPK2
								HLA-B				HLA-B
								HMGA1				HMGA1
								HMGA2				HMGA2
								HNF1B				HNF1B
								HNRNPA2B1				HNRNPA2B1
								HPSE				HPSE
								HSP90B1				HSP90B1
								HSPB8				HSPB8
								HTR1D				HTR1D
								IARS				IARS
								IDO1				IDO1
								IFNAR1				IFNAR1
								IGF2R				IGF2R
								IGFBP3				IGFBP3
								IL10RA				IL10RA
								IL12A				IL12A
								IL12RB1				IL12RB1
								IL1R2				IL1R2
								IL23R				IL23R
								IL5				IL5
								INPP5D				INPP5D
								IRS2				IRS2
								ISL1				ISL1
								KCNE1				KCNE1
								KIF1B				KIF1B
								KITLG				KITLG
								KL				KL
								KRT1				KRT1
								LAMA1				LAMA1
								LAMA3				LAMA3
								LAMC2				LAMC2
								LAMP2				LAMP2
								LARS2				LARS2
								LGALS3				LGALS3
								LIG3				LIG3
								LOX				LOX
								LOXL2				LOXL2
								MAD1L1				MAD1L1
								MAN2B1				MAN2B1
								MAP2K7				MAP2K7
								MAPK8IP1				MAPK8IP1
								MBP				MBP
								MC4R				MC4R
								MMP15				MMP15
								MOG				MOG
								MST1				MST1
								MSTN				MSTN
								MYH2				MYH2
								MYL3				MYL3
								MYL4				MYL4
								NAGA				NAGA
								NAT1				NAT1
								NCK1				NCK1
								NKX2-1				NKX2-1
								NNMT				NNMT
								NONO				NONO
								NOTCH4				NOTCH4
								NR1I3				NR1I3
								NSDHL				NSDHL
								NUP62				NUP62
								OAS1				OAS1
								OTX2				OTX2
								P2RX7				P2RX7
								P2RY2				P2RY2
								PAK6				PAK6
								PARN				PARN
								PDE3B				PDE3B
								PDE4B				PDE4B
								PDE4C				PDE4C
								PDE7A				PDE7A
								PEBP1				PEBP1
								PEPD				PEPD
								PHB				PHB
								PIK3C2A				PIK3C2A
								PIM2				PIM2
								PKD1				PKD1
								PLAUR				PLAUR
								PNPO				PNPO
								POLR1D				POLR1D
								PPARA				PPARA
								PPM1A				PPM1A
								PRDM1				PRDM1
								PRF1				PRF1
								PRKG2				PRKG2
								PROM1				PROM1
								PRTN3				PRTN3
								PSMA7				PSMA7
								PSTPIP1				PSTPIP1
								PTGDS				PTGDS
								PTPRD				PTPRD
								PTPRO				PTPRO
								RAB5A				RAB5A
								RAD21				RAD21
								RAN				RAN
								RAPGEF3				RAPGEF3
								RASSF1				RASSF1
								RBP4				RBP4
								RNASEL				RNASEL
								RORC				RORC
								ROS1				ROS1
								RPA1				RPA1
								RPA2				RPA2
								RPSA				RPSA
								RTN4				RTN4
								S1PR1				S1PR1
								SCARB1				SCARB1
								SDHC				SDHC
								SEC24C				SEC24C
								SEMA3A				SEMA3A
								SERPIND1				SERPIND1
								SERPINF1				SERPINF1
								SGCD				SGCD
								SHC1				SHC1
								SIX1				SIX1
								SKP2				SKP2
								SLC15A1				SLC15A1
								SLC18A2				SLC18A2
								SLC22A2				SLC22A2
								SLC25A13				SLC25A13
								SLC40A1				SLC40A1
								SLCO1B3				SLCO1B3
								SMAD6				SMAD6
								SMARCB1				SMARCB1
								SMC1A				SMC1A
								SNAI2				SNAI2
								SNRPB				SNRPB
								SNRPN				SNRPN
								SOX5				SOX5
								SPRY2				SPRY2
								SSTR3				SSTR3
								STS				STS
								SYT1				SYT1
								TAP2				TAP2
								TAT				TAT
								TBX21				TBX21
								TBX3				TBX3
								TFF1				TFF1
								TFPI				TFPI
								TGM1				TGM1
								THBS1				THBS1
								TIMP1				TIMP1
								TIMP3				TIMP3
								TMPO				TMPO
								TNFRSF10A				TNFRSF10A
								TNFRSF21				TNFRSF21
								TNFSF13B				TNFSF13B
								TNFSF15				TNFSF15
								TRIM25				TRIM25
								TRPC4				TRPC4
								TRPS1				TRPS1
								TUBB4A				TUBB4A
								TXN2				TXN2
								UCP2				UCP2
								UMPS				UMPS
								USP10				USP10
								VEGFB				VEGFB
								XPA				XPA
								XPO1				XPO1
								ZIC1				ZIC1
								A4GALT				A4GALT
								ABCA5				ABCA5
								ABCA7				ABCA7
								ABCG1				ABCG1
								ACAD9				ACAD9
								ACADL				ACADL
								ACP1				ACP1
								ADAMTS1				ADAMTS1
								ADCY2				ADCY2
								ADM				ADM
								ADRB3				ADRB3
								ADSS				ADSS
								AGER				AGER
								AGTR2				AGTR2
								AHSG				AHSG
								AKAP13				AKAP13
								AKR1A1				AKR1A1
								ALOX12				ALOX12
								ALOX5AP				ALOX5AP
								AMH				AMH
								AMPD1				AMPD1
								ANGPT2				ANGPT2
								ANK1				ANK1
								ANK3				ANK3
								ANXA11				ANXA11
								ANXA4				ANXA4
								AOC3				AOC3
								APOH				APOH
								AQP4				AQP4
								AREG				AREG
								ARRB2				ARRB2
								ASXL1				ASXL1
								ATF3				ATF3
								ATG16L1				ATG16L1
								ATG5				ATG5
								AUH				AUH
								BAG3				BAG3
								BMI1				BMI1
								BMP6				BMP6
								BRD4				BRD4
								BSG				BSG
								BTD				BTD
								C5AR1				C5AR1
								CANT1				CANT1
								CAV3				CAV3
								CBR3				CBR3
								CCL20				CCL20
								CCL5				CCL5
								CCR8				CCR8
								CD34				CD34
								CD86				CD86
								CD9				CD9
								CDC45				CDC45
								CDH15				CDH15
								CDT1				CDT1
								CEBPB				CEBPB
								CES2				CES2
								CFP				CFP
								CHIT1				CHIT1
								CHRNA3				CHRNA3
								CHRNB4				CHRNB4
								CITED2				CITED2
								CLEC7A				CLEC7A
								CLIP1				CLIP1
								CMA1				CMA1
								COL18A1				COL18A1
								COL4A4				COL4A4
								COL6A3				COL6A3
								COX5A				COX5A
								CRAT				CRAT
								CS				CS
								CSF1				CSF1
								CSF2				CSF2
								CSTA				CSTA
								CUL5				CUL5
								CXCL10				CXCL10
								CXCR3				CXCR3
								CYP2F1				CYP2F1
								CYP2J2				CYP2J2
								DKK2				DKK2
								DLK1				DLK1
								DLL1				DLL1
								DNAJC5				DNAJC5
								DNASE1L3				DNASE1L3
								DOCK1				DOCK1
								DPP6				DPP6
								DSG1				DSG1
								DYRK2				DYRK2
								EGR1				EGR1
								ELK1				ELK1
								ELN				ELN
								ENPP2				ENPP2
								ERAP1				ERAP1
								EXO1				EXO1
								FABP1				FABP1
								FABP3				FABP3
								FANCL				FANCL
								FBLN1				FBLN1
								FBXW7				FBXW7
								FCER1A				FCER1A
								FGF19				FGF19
								FGF4				FGF4
								FGF9				FGF9
								FOSL1				FOSL1
								FOXA2				FOXA2
								FOXC2				FOXC2
								FOXG1				FOXG1
								FOXO3				FOXO3
								FOXP2				FOXP2
								FSCN1				FSCN1
								FUS				FUS
								FUT2				FUT2
								FUT8				FUT8
								GAB1				GAB1
								GAB2				GAB2
								GABARAPL1				GABARAPL1
								GABRB1				GABRB1
								GAL				GAL
								GALC				GALC
								GANAB				GANAB
								GFM1				GFM1
								GFRA1				GFRA1
								GNE				GNE
								GOT2				GOT2
								GPC1				GPC1
								GPNMB				GPNMB
								GREM1				GREM1
								GRIK4				GRIK4
								GRIK5				GRIK5
								GRK6				GRK6
								GRM7				GRM7
								GSTO1				GSTO1
								GSTO2				GSTO2
								H2AFX				H2AFX
								HDAC7				HDAC7
								HDC				HDC
								HFE				HFE
								HGD				HGD
								HLA-DQB1				HLA-DQB1
								HLA-G				HLA-G
								HMGB1				HMGB1
								HP				HP
								HRH2				HRH2
								HSD17B1				HSD17B1
								HSD17B2				HSD17B2
								HSP90AB1				HSP90AB1
								HSPA1L				HSPA1L
								HTR1B				HTR1B
								HTR4				HTR4
								ID2				ID2
								IFNGR2				IFNGR2
								IGFBP2				IGFBP2
								IL12B				IL12B
								IL12RB2				IL12RB2
								IL13				IL13
								IL17RA				IL17RA
								IL18				IL18
								IL1A				IL1A
								IL9				IL9
								INHA				INHA
								INHBA				INHBA
								INVS				INVS
								IRF4				IRF4
								ISCU				ISCU
								ITGA8				ITGA8
								ITGAX				ITGAX
								ITPKC				ITPKC
								KAT6A				KAT6A
								KCNK1				KCNK1
								KISS1R				KISS1R
								KLF5				KLF5
								KLF6				KLF6
								KLK1				KLK1
								KMT2A				KMT2A
								KNG1				KNG1
								KRT6A				KRT6A
								LAMA4				LAMA4
								LAMB2				LAMB2
								LBP				LBP
								LCN2				LCN2
								LITAF				LITAF
								LTB4R				LTB4R
								LTF				LTF
								LZTR1				LZTR1
								MAD2L2				MAD2L2
								MAFB				MAFB
								MAP3K14				MAP3K14
								MASP2				MASP2
								MB				MB
								MDK				MDK
								MED12				MED12
								MEFV				MEFV
								MLX				MLX
								MLYCD				MLYCD
								MMP12				MMP12
								MPI				MPI
								MPZ				MPZ
								MTHFD2				MTHFD2
								MUTYH				MUTYH
								MYBPC1				MYBPC1
								MYO5A				MYO5A
								MYOD1				MYOD1
								NAGLU				NAGLU
								NCOA1				NCOA1
								NEU1				NEU1
								NKX2-5				NKX2-5
								NNT				NNT
								NOD1				NOD1
								NPHP1				NPHP1
								NPPB				NPPB
								NTF3				NTF3
								NTF4				NTF4
								NTN1				NTN1
								OLR1				OLR1
								OPA1				OPA1
								OPRD1				OPRD1
								P2RX1				P2RX1
								P2RY1				P2RY1
								PBRM1				PBRM1
								PDE1B				PDE1B
								PDE9A				PDE9A
								PDGFA				PDGFA
								PDGFC				PDGFC
								PDIA3				PDIA3
								PEX1				PEX1
								PGF				PGF
								PGM3				PGM3
								PGRMC1				PGRMC1
								PHOX2B				PHOX2B
								PIGA				PIGA
								PKN2				PKN2
								PLA2G10				PLA2G10
								PLAGL1				PLAGL1
								PLCE1				PLCE1
								POFUT1				POFUT1
								POLR1C				POLR1C
								POSTN				POSTN
								PRSS8				PRSS8
								PSMA4				PSMA4
								PSMB1				PSMB1
								PTDSS1				PTDSS1
								PTPN3				PTPN3
								PURA				PURA
								RAB3A				RAB3A
								RAD23B				RAD23B
								RAD51C				RAD51C
								RB1CC1				RB1CC1
								RELB				RELB
								REST				REST
								RFC2				RFC2
								RGS2				RGS2
								RGS9				RGS9
								RHAG				RHAG
								RNASEH2A				RNASEH2A
								RPS27A				RPS27A
								RPS6KA5				RPS6KA5
								RPTOR				RPTOR
								RRAS				RRAS
								S100A4				S100A4
								S100A9				S100A9
								S1PR5				S1PR5
								SALL1				SALL1
								SALL4				SALL4
								SCARB2				SCARB2
								SCO2				SCO2
								SDC1				SDC1
								SDHD				SDHD
								SEC63				SEC63
								SELE				SELE
								SERPINA3				SERPINA3
								SERPINB5				SERPINB5
								SERPINF2				SERPINF2
								SFTPB				SFTPB
								SFTPD				SFTPD
								SI				SI
								SIRPA				SIRPA
								SIRT6				SIRT6
								SIX6				SIX6
								SKIL				SKIL
								SLC17A5				SLC17A5
								SLC18A3				SLC18A3
								SLC22A3				SLC22A3
								SLC22A4				SLC22A4
								SLC26A2				SLC26A2
								SLC2A10				SLC2A10
								SLC5A6				SLC5A6
								SLC5A7				SLC5A7
								SLC7A11				SLC7A11
								SLCO2A1				SLCO2A1
								SMAD1				SMAD1
								SMARCAL1				SMARCAL1
								SNAI1				SNAI1
								SOAT2				SOAT2
								SOCS1				SOCS1
								SOCS2				SOCS2
								SOCS3				SOCS3
								SOX17				SOX17
								SP1				SP1
								SPINK1				SPINK1
								SPINT2				SPINT2
								SPRY4				SPRY4
								SRD5A1				SRD5A1
								SREBF1				SREBF1
								STT3B				STT3B
								SUFU				SUFU
								SUMF1				SUMF1
								SYP				SYP
								TAC1				TAC1
								TAPBP				TAPBP
								TCF7				TCF7
								TCN2				TCN2
								TET2				TET2
								TFAM				TFAM
								THBD				THBD
								TICAM1				TICAM1
								TIMP2				TIMP2
								TJP1				TJP1
								TK2				TK2
								TLR6				TLR6
								TNFRSF17				TNFRSF17
								TNFRSF25				TNFRSF25
								TNKS				TNKS
								TNNT1				TNNT1
								TNXB				TNXB
								TPH1				TPH1
								TYROBP				TYROBP
								UBE2T				UBE2T
								VAPA				VAPA
								VIP				VIP
								VIPR2				VIPR2
								VPS35				VPS35
								VTN				VTN
								WASF1				WASF1
								WFS1				WFS1
								WIPF1				WIPF1
								WNT2				WNT2
								WNT5B				WNT5B
								XPC				XPC
								XRCC5				XRCC5
								ZIC2				ZIC2
								ACTR2				ACTR2
								ADARB1				ADARB1
								ADCY8				ADCY8
								AHI1				AHI1
								AIMP1				AIMP1
								ALPI				ALPI
								ANXA6				ANXA6
								APOA2				APOA2
								ARHGDIB				ARHGDIB
								ARNT				ARNT
								ASCL1				ASCL1
								ATG7				ATG7
								B3GAT1				B3GAT1
								BAMBI				BAMBI
								BCS1L				BCS1L
								BRS3				BRS3
								C3AR1				C3AR1
								CALCA				CALCA
								CAMK1				CAMK1
								CARTPT				CARTPT
								CCL11				CCL11
								CD163				CD163
								CD74				CD74
								CDX2				CDX2
								CEACAM1				CEACAM1
								CGA				CGA
								CHI3L1				CHI3L1
								CHRM5				CHRM5
								CHRND				CHRND
								COL10A1				COL10A1
								COL11A1				COL11A1
								COL6A1				COL6A1
								COL7A1				COL7A1
								COL9A1				COL9A1
								COL9A3				COL9A3
								CRBN				CRBN
								CRH				CRH
								CRTC1				CRTC1
								CXCL1				CXCL1
								CXCR1				CXCR1
								CYP2S1				CYP2S1
								CYP3A7				CYP3A7
								CYP7A1				CYP7A1
								CYSLTR1				CYSLTR1
								DAB2				DAB2
								DARS2				DARS2
								DDIT4				DDIT4
								DLG1				DLG1
								DRD1				DRD1
								DUOX2				DUOX2
								DUSP4				DUSP4
								EFEMP2				EFEMP2
								EMX2				EMX2
								EWSR1				EWSR1
								FABP2				FABP2
								FANCE				FANCE
								FANCG				FANCG
								FBL				FBL
								FCGR3B				FCGR3B
								FOXA1				FOXA1
								GDF2				GDF2
								GGH				GGH
								GP1BB				GP1BB
								GRB10				GRB10
								GRK5				GRK5
								GYPA				GYPA
								HAMP				HAMP
								HBEGF				HBEGF
								HBG2				HBG2
								HCRTR1				HCRTR1
								HIRA				HIRA
								HLA-C				HLA-C
								HLA-DPB1				HLA-DPB1
								HNRNPU				HNRNPU
								HSD3B1				HSD3B1
								HSF2				HSF2
								HSPA1A				HSPA1A
								ICOS				ICOS
								IGFALS				IGFALS
								IGFBP1				IGFBP1
								IL16				IL16
								IL17A				IL17A
								IL18R1				IL18R1
								IL1RAP				IL1RAP
								IL3				IL3
								INPP5K				INPP5K
								KRT13				KRT13
								LAMA2				LAMA2
								LAP3				LAP3
								LCP2				LCP2
								LGALS1				LGALS1
								LIF				LIF
								LONP1				LONP1
								LOXL1				LOXL1
								LPP				LPP
								LTC4S				LTC4S
								LY96				LY96
								MAGI2				MAGI2
								MAOB				MAOB
								MAP1LC3B				MAP1LC3B
								MID1				MID1
								MTRR				MTRR
								NAT2				NAT2
								NEK1				NEK1
								NFIX				NFIX
								NHP2				NHP2
								NSD1				NSD1
								OSM				OSM
								P2RX2				P2RX2
								P2RX4				P2RX4
								PALB2				PALB2
								PEX19				PEX19
								POLR1A				POLR1A
								POLR2B				POLR2B
								PON2				PON2
								PPBP				PPBP
								PRKCSH				PRKCSH
								PRL				PRL
								PYCARD				PYCARD
								PYY				PYY
								RANBP1				RANBP1
								RAPGEF4				RAPGEF4
								RBL2				RBL2
								RETN				RETN
								RGS4				RGS4
								RREB1				RREB1
								S100A6				S100A6
								SEMA3C				SEMA3C
								SEMA3E				SEMA3E
								SEMA7A				SEMA7A
								SERPINB8				SERPINB8
								SGCG				SGCG
								SH3GL2				SH3GL2
								SLC10A1				SLC10A1
								SLC24A4				SLC24A4
								SLC26A4				SLC26A4
								SLC29A3				SLC29A3
								SLC4A2				SLC4A2
								SMAD7				SMAD7
								SOST				SOST
								SPHK2				SPHK2
								SSTR1				SSTR1
								SULT1A1				SULT1A1
								TACR2				TACR2
								TFE3				TFE3
								TG				TG
								TIA1				TIA1
								TLL1				TLL1
								TNFRSF18				TNFRSF18
								TNFRSF8				TNFRSF8
								TREM2				TREM2
								TRPM8				TRPM8
								TSG101				TSG101
								UBR1				UBR1
								VAC14				VAC14
								VANGL1				VANGL1
								WNT6				WNT6
								XRCC1				XRCC1
								XRCC4				XRCC4
								ZMPSTE24				ZMPSTE24
								2020-09-09				2020-09-09
								ABCB7				ABCB7
								ABCG8				ABCG8
								ACSBG1				ACSBG1
								ACTC1				ACTC1
								ACTR3				ACTR3
								ADAM8				ADAM8
								ADAMTS3				ADAMTS3
								ADIPOR2				ADIPOR2
								AGK				AGK
								AKAP9				AKAP9
								ANXA3				ANXA3
								APLNR				APLNR
								APOA4				APOA4
								APOBEC3G				APOBEC3G
								ARF4				ARF4
								ARHGAP5				ARHGAP5
								ARNTL				ARNTL
								ARX				ARX
								ASPSCR1				ASPSCR1
								ASRGL1				ASRGL1
								ATP12A				ATP12A
								ATP4A				ATP4A
								BHMT				BHMT
								BHMT2				BHMT2
								BNIP3				BNIP3
								BSCL2				BSCL2
								BST1				BST1
								C4A				C4A
								C4B				C4B
								C7				C7
								CA3				CA3
								CABIN1				CABIN1
								CADM1				CADM1
								CAV2				CAV2
								CCL19				CCL19
								CCL21				CCL21
								CCL7				CCL7
								CD1A				CD1A
								CD209				CD209
								CD63				CD63
								CD80				CD80
								CD96				CD96
								CDC20				CDC20
								CDH13				CDH13
								CDH23				CDH23
								CDIPT				CDIPT
								CEACAM5				CEACAM5
								CHGA				CHGA
								CHKA				CHKA
								CHRNA6				CHRNA6
								CHST14				CHST14
								CLCN3				CLCN3
								CNTF				CNTF
								COL4A5				COL4A5
								COQ6				COQ6
								CREM				CREM
								CRLF1				CRLF1
								CSRP3				CSRP3
								CTNND2				CTNND2
								CTSE				CTSE
								CTTN				CTTN
								CX3CL1				CX3CL1
								CXADR				CXADR
								DDX1				DDX1
								DDX41				DDX41
								DECR1				DECR1
								DIS3L2				DIS3L2
								DLL3				DLL3
								DST				DST
								DSTYK				DSTYK
								EDA				EDA
								EDAR				EDAR
								EDEM1				EDEM1
								EEF1D				EEF1D
								EFTUD2				EFTUD2
								EHD1				EHD1
								ELAVL1				ELAVL1
								ELOVL5				ELOVL5
								EPO				EPO
								EPX				EPX
								EREG				EREG
								ERF				ERF
								FAM20C				FAM20C
								FANCF				FANCF
								FANCI				FANCI
								FAP				FAP
								FBN2				FBN2
								FCGR1A				FCGR1A
								FGF7				FGF7
								FIBP				FIBP
								FOSL2				FOSL2
[truncated: 2,041 more rows]
