# Supplementary material for: Mechanism of YuPingFeng in the Treatment of COPD Based on Network Pharmacology
Source: Biomed Res Int. 2020 May 27;2020:1630102. doi: 10.1155/2020/1630102 (PMC7275212; doi:10.1155/2020/1630102)
Supplement: Supplementary Materials — Table S1: putative targets of each herb contained in YPF. Table S2: known therapeutic targets for COPD. Table S3: disease-drug-ingredient-target interaction network. [file 1630102.f1.zip › TableS3 Disease-drug-ingredient-target interaction network.xlsx]

## Sheet: Sheet1
Node1	Node2	Net
COPD	IL6	disease
COPD	VEGFA	disease
COPD	CRP	disease
COPD	ICAM1	disease
COPD	NOS3	disease
COPD	EGFR	disease
COPD	PTGS1	disease
COPD	CCND1	disease
COPD	MYC	disease
COPD	BCL2	disease
COPD	TP63	disease
COPD	PPARG	disease
COPD	CHRM3	disease
COPD	CASP8	disease
COPD	CAV1	disease
COPD	IGF2	disease
COPD	ERBB2	disease
COPD	RAF1	disease
COPD	GSTM1	disease
COPD	VCAM1	disease
COPD	CASP3	disease
COPD	GSTP1	disease
COPD	PON1	disease
COPD	SELE	disease
COPD	PLAU	disease
COPD	HIF1A	disease
COPD	ESR1	disease
COPD	PRSS1	disease
COPD	F7	disease
COPD	ALOX5	disease
COPD	NFKBIA	disease
COPD	ACHE	disease
COPD	CYP1B1	disease
COPD	HSPB1	disease
COPD	RB1	disease
COPD	MAPK8	disease
COPD	NFE2L2	disease
COPD	RUNX2	disease
COPD	ESR2	disease
COPD	AR	disease
COPD	IGFBP3	disease
COPD	RELA	disease
COPD	FOS	disease
COPD	CASP9	disease
COPD	PGR	disease
COPD	CYP1A1	disease
COPD	IRF1	disease
COPD	BIRC5	disease
COPD	ERBB3	disease
COPD	IKBKB	disease
COPD	CHEK2	disease
COPD	NQO1	disease
COPD	GSK3B	disease
COPD	DUOX2	disease
COPD	CTSD	disease
COPD	HTR3A	disease
COPD	PARP1	disease
COPD	POR	disease
COPD	CYP3A4	disease
COPD	AHR	disease
COPD	RASSF1	disease
COPD	PRKCA	disease
COPD	CCNB1	disease
COPD	SLC2A4	disease
COPD	RASA1	disease
COPD	RXRB	disease
COPD	ADRA1A	disease
COPD	AKR1B1	disease
COPD	CHRM2	disease
COPD	CHRM1	disease
COPD	NR1I3	disease
COPD	CHEK1	disease
COPD	AKR1C3	disease
COPD	ADRA2C	disease
COPD	ELK1	disease
COPD	ACACA	disease
COPD	DIO1	disease
COPD	NCOA1	disease
COPD	GSTM2	disease
COPD	EIF6	disease
COPD	CHRM5	disease
MOL000378	PTGS1	target
huangqi	MOL000378	mol
MOL000378	CHRM3	target
MOL000378	CHRM1	target
MOL000378	ESR1	target
MOL000378	AR	target
MOL000378	PPARG	target
MOL000378	CHRM5	target
MOL000378	ADRA2C	target
MOL000378	ADRA1A	target
MOL000378	CHRM2	target
MOL000378	ESR2	target
MOL000378	GSK3B	target
MOL000378	CHEK1	target
MOL000378l	RXRB	target
MOL000378	PRSS1	target
MOL000380	PTGS1	target
huangqi	MOL000380	mol
MOL000380	CHRM3	target
MOL000380	CHRM1	target
MOL000380	ESR1	target
MOL000380	HTR3A	target
MOL000380	ACHE	target
MOL000380	PRSS1	target
MOL000380	NCOA1	target
MOL000392	PTGS1	target
huangqi	MOL000392	mol
MOL000392	CHRM1	target
MOL000392	ESR1	target
MOL000392	AR	target
MOL000392	PPARG	target
MOL000392	ADRA1A	target
MOL000392	ESR2	target
MOL000392	GSK3B	target
MOL000392	CHEK1	target
MOL000392	PRSS1	target
MOL000392	ACHE	target
MOL000392	PPARG	target
MOL000417	PTGS1	target
huangqi	MOL000417	mol
MOL000417	ESR1	target
MOL000417	AR	target
MOL000417	PPARG	target
MOL000417	ESR2	target
MOL000417	GSK3B	target
MOL000417	CHEK1	target
MOL000417	PRSS1	target
MOL000422	PTGS1	target
huangqi	MOL000422	mol
MOL000422	AR	target
MOL000422	PPARG	target
MOL000422	PRSS1	target
MOL000422	PGR	target
MOL000422	CHRM1	target
MOL000422	ACHE	target
MOL000422	CHRM2	target
MOL000422	F7	target
MOL000422	RELA	target
MOL000422	IKBKB	target
MOL000422	BCL2	target
MOL000422	CASP3	target
MOL000422	MAPK8	target
MOL000422	PPARG	target
MOL000422	CYP3A4	target
MOL000422	CYP1A1	target
MOL000422	ICAM1	target
MOL000422	SELE	target
MOL000422	VCAM1	target
MOL000422	CYP1B1	target
MOL000422	ALOX5	target
MOL000422	GSTP1	target
MOL000422	AHR	target
MOL000422	SLC2A4	target
MOL000422	NR1I3	target
MOL000422	DIO1	target
MOL000422	GSTM1	target
MOL000422	GSTM2	target
MOL000422	AKR1C3	target
MOL000433	GSK3B	target
huangqi	MOL000433	mol
MOL000442	PRSS1	target
huangqi	MOL000442	mol
MOL000098	PTGS1	target
huangqi	MOL000098	mol
MOL000098	AR	target
MOL000098	PPARG	target
MOL000098	AKR1B1	target
MOL000098	PRSS1	target
MOL000098	F7	target
MOL000098	ACHE	target
MOL000098	RELA	target
MOL000098	EGFR	target
MOL000098	VEGFA	target
MOL000098	CCND1	target
MOL000098	BCL2	target
MOL000098	FOS	target
MOL000098	EIF6	target
MOL000098	CASP9	target
MOL000098	PLAU	target
MOL000098	RB1	target
MOL000098	IL6	target
MOL000098	CASP3	target
MOL000098	TP63	target
MOL000098	ELK1	target
MOL000098	NFKBIA	target
MOL000098	POR	target
MOL000098	CASP8	target
MOL000098	RAF1	target
MOL000098	PRKCA	target
MOL000098	HIF1A	target
MOL000098	ERBB2	target
MOL000098	PPARG	target
MOL000098	ACACA	target
MOL000098	CYP3A4	target
MOL000098	CAV1	target
MOL000098	MYC	target
MOL000098	CYP1A1	target
MOL000098	ICAM1	target
MOL000098	SELE	target
MOL000098	VCAM1	target
MOL000098	BIRC5	target
MOL000098	DUOX2	target
MOL000098	NOS3	target
MOL000098	HSPB1	target
MOL000098	CYP1B1	target
MOL000098	CCNB1	target
MOL000098	ALOX5	target
MOL000098	GSTP1	target
MOL000098	NFE2L2	target
MOL000098	NQO1	target
MOL000098	PARP1	target
MOL000098	AHR	target
MOL000098	SLC2A4	target
MOL000098	NR1I3	target
MOL000098	CHEK2	target
MOL000098	CRP	target
MOL000098	RUNX2	target
MOL000098	RASSF1	target
MOL000098	CTSD	target
MOL000098	IGFBP3	target
MOL000098	IGF2	target
MOL000098	IRF1	target
MOL000098	ERBB3	target
MOL000098	PON1	target
MOL000098	DIO1	target
MOL000098	RASA1	target
MOL000098	GSTM1	target
MOL000098	GSTM2	target
COPD	PTGS1	disease
COPD	BCL2	disease
COPD	CHRM3	disease
COPD	CASP8	disease
COPD	CASP3	disease
COPD	PON1	disease
COPD	ESR1	disease
COPD	PRSS1	disease
COPD	F7	disease
COPD	ACHE	disease
COPD	ESR2	disease
COPD	AR	disease
COPD	CASP9	disease
COPD	PGR	disease
COPD	NR3C2	disease
COPD	GSK3B	disease
COPD	PRKCA	disease
COPD	ADRA1A	disease
COPD	CHRM2	disease
COPD	CHRM1	disease
COPD	CHEK1	disease
COPD	CHRNA2	disease
COPD	NCOA1	disease
MOL000011	ESR1	target
fangfeng	MOL000011	mol
MOL000011	AR	target
MOL000011	F7	target
MOL000011	PRSS1	target
MOL000011	NCOA1	target
MOL011730	PTGS1	target
fangfeng	MOL011730	mol
MOL011732	PRSS1	target
fangfeng	MOL011732	mol
MOL011737	AR	target
fangfeng	MOL011737	mol
MOL001941	CHRM1	target
fangfeng	MOL001941	mol
MOL011753	PTGS1	target
fangfeng	MOL011753	mol
MOL011753	CHRM1	target
MOL011753	ESR1	target
MOL011753	AR	target
MOL011753	ACHE	target
MOL011753	ADRA1A	target
MOL011753	ESR2	target
MOL011753	GSK3B	target
MOL002644	CHRM1	target
fangfeng	MOL002644	mol
MOL000359	PGR	target
fangfeng	MOL000359	mol
MOL000359	NR3C2	target
MOL000358	PGR	target
fangfeng	MOL000358	mol
MOL000358	PTGS1	target
MOL000358	CHRM3	target
MOL000358	CHRM1	target
MOL000358	ADRA1A	target
MOL000358	CHRM2	target
MOL000358	CHRNA2	target
MOL000358	BCL2	target
MOL000358	CASP9	target
MOL000358	CASP3	target
MOL000358	CASP8	target
MOL000358	PRKCA	target
MOL000358	PON1	target
MOL001494	PTGS1	target
fangfeng	MOL001494	mol
MOL003588	PTGS1	target
fangfeng	MOL003588	mol
MOL003588	ESR1	target
MOL003588	AR	target
MOL003588	CHEK1	target
MOL013077	CHRM3	target
fangfeng	MOL013077	mol
MOL013077	CHRM1	target
MOL013077	ESR1	target
MOL013077	ACHE	target
COPD	CHRM3	disease
COPD	ACHE	disease
COPD	AR	disease
COPD	PGR	disease
COPD	ADRA1A	disease
COPD	CHRM2	disease
COPD	CHRM1	disease
COPD	NCOA1	disease
MOL000033	PGR	target
baizhu	MOL000033	mol
MOL000049	CHRM3	target
baizhu	MOL000049	mol
MOL000049	CHRM1	target
MOL000049	AR	target
MOL000049	ACHE	target
MOL000049	ADRA1A	target
MOL000049	CHRM2	target
MOL000072	NCOA1	target
baizhu	MOL000072	mol
